# Supplementary material for: Viscosity measurement based on the tapping-induced free vibration of sessile droplets using MEMS-based piezoresistive cantilevers
Source: Royal Society of Chemistry journal article supplement (doi:10.1039/c5lc00661a), 2015-01-01
Supplement: c5lc00661a1.pdf [file c5lc00661a1.pdf]

## SUPPLEMENTARY INFORMATION

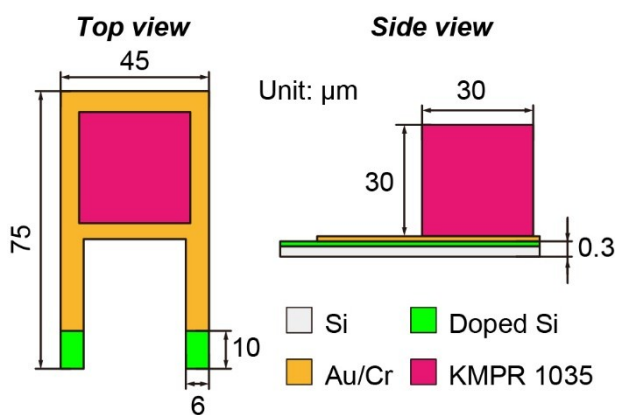

Figure S1 Design parameters of a piezoresistive cantilever.

Table 1. Viscosity of the prepared liquid samples.

| Water - glycerol solution | Viscosity (mPa·s) |
|---------------------------|-------------------|
| Water                     | 0.97              |
| Glycerol 17%              | 1.93              |
| Glycerol 25%              | 2.39              |
| Glycerol 33%              | 2.98              |
| Glycerol 50%              | 6.79              |
| Glycerol 70%              | 30.70             |
